1 **Title:** Decomposing leaf mass into photosynthetic and structural components explains  
2 divergent patterns of trait variation within and among plant species

3  
4 **Running title:** Photosynthetic and structural leaf mass

5  
6 **Authors:** Masatoshi Katabuchi<sup>1,2</sup>, Kaoru Kitajima<sup>1,3,4</sup>, S. Joseph Wright<sup>4</sup>, Sunshine A. Van  
7 Bael<sup>4,5</sup>, Jeanne L. D. Osnas<sup>1</sup> and Jeremy W. Lichstein<sup>1</sup>

8  
9 <sup>1</sup> Department of Biology, University of Florida, Gainesville, FL 32611, USA

10 <sup>2</sup> Department of Agricultural and Biological Engineering, University of Florida, Gainesville,  
11 FL 32611, USA

12 <sup>3</sup> Graduate School of Agriculture, Kyoto University, Kitashirakawa Oiwake-Cho, Kyoto 606-  
13 8502 Japan

14 <sup>4</sup> Smithsonian Tropical Research Institute, 9100 Panama City Pl., Washington, DC 20521

15 <sup>5</sup> Department of Ecology and Evolutionary Biology, Tulane University, New Orleans, LA  
16 70118 USA

17  
18 **Total word count:** 5915

19 **Summary:** 200

20 **Introduction:** 1245

21 **Material and Methods:** 2190

22 **Results:** 981

23 **Discussion:** 1427

24 **Acknowledgments:** 72

25 **Number of figures:** 6

26 **Number of tables:** 0

27 **Number of SI files:** 1 (Notes S1-4, Fig. S1-5, and Table S1-4)

28  
29 **Author for correspondence:** Masatoshi Katabuchi

30 **Mailing address:** Department of Biology, University of Florida, Gainesville, FL 32611,  
31 USA

32 **Email:** [mattocci27@gmail.com](mailto:mattocci27@gmail.com)

33 **Telephone:** 352-392-1540

34

35

## Abstract

- Across the global flora, photosynthetic and metabolic rates depend more strongly on leaf area than leaf mass. In contrast, intraspecific variation in these rates is strongly mass-dependent. These contrasting patterns suggest that the causes of variation in leaf mass per area (LMA) may be fundamentally different within vs. among species.
- We used statistical methods to decompose LMA into two conceptual components – ‘photosynthetic’ LMA<sub>p</sub> (which determines photosynthetic capacity and metabolic rates, and also affects optimal leaf lifespan) and ‘structural’ LMA<sub>s</sub> (which determines leaf toughness and potential leaf lifespan) using leaf trait data from tropical forest sites in Panama and a global leaf-trait database.
- Statistically decomposing LMA into LMA<sub>p</sub> and LMA<sub>s</sub> provides improved predictions of trait variation (photosynthesis, respiration, and lifespan) across the global flora, and within and among tropical plant species in Panama. Our analysis shows that most interspecific LMA variation is due to LMA<sub>s</sub> (which explains why photosynthetic and metabolic traits are area-dependent across species) and that intraspecific LMA variation is due to changes in both LMA<sub>p</sub> and LMA<sub>s</sub> (which explains why photosynthetic and metabolic traits are mass-dependent within species).
- Our results suggest that leaf trait variation is multi-dimensional and is not well-represented by the one-dimensional leaf economics spectrum.

**Keywords:** Bayesian inference, functional diversity, global vegetation models, interspecific variation, intraspecific variability, latent variables, null models, optimal leaf lifespan

## Introduction

Over the past two decades, the ‘leaf economics spectrum’ (LES) (Reich *et al.*, 1997; Wright *et al.*, 2004; Reich, 2014) has become a cornerstone of plant ecology. The LES captures tight relationships among leaf mass per area (LMA), leaf lifespan (LL), and mass-normalized leaf traits related to carbon fixation and nutrient use, suggesting the presence of a single dominant axis of leaf functional variation, ranging from short-lived leaves with high photosynthetic potential and fast returns on investment to long-lived leaves with low photosynthetic potential and slow returns (Wright *et al.*, 2004; Westoby & Wright, 2006; Reich, 2014). Because the mass-based LES constrains variation in green leaf traits to a single axis, it has been proposed as a simple framework for incorporating more realistic levels of

69 leaf trait diversity in global carbon-climate models (Bonan *et al.*, 2002; Wright *et al.*, 2004).  
 70 However, recent analyses suggest that the one-dimensional LES is largely the result of high  
 71 interspecific variation in LMA combined with mass-normalization of area-dependent traits  
 72 (Osnas *et al.*, 2013; Lloyd *et al.*, 2013).

73 The essence of the problem follows (see Osnas *et al.* 2013 and Notes S1 for details).  
 74 Let  $X$  represent the whole-leaf value of a purely area-dependent trait; i.e.,  $X$  is proportional to  
 75 leaf area, where  $X$  could be the photosynthetic capacity of the entire leaf (units = moles  $\text{CO}_2$   
 76 fixed per-unit time), the amount of nitrogen in the entire leaf (units = grams of nitrogen), etc.  
 77 The mass-normalized trait value would then be  $X/\text{Mass}$ , which (assuming  $X$  is proportional to  
 78 leaf area) is proportional to  $\text{Area}/\text{Mass} = \text{LMA}^{-1}$ . This simplistic example shows that if traits  
 79 are actually area-dependent, mass normalization can introduce spurious correlations; i.e., in  
 80 this example,  $X/\text{Mass}$  is proportional to  $\text{LMA}^{-1}$ , even though  $X$  is assumed to depend only on  
 81 leaf area. Thus, the strong correlations observed among LMA and mass-normalized traits  
 82 (Reich *et al.* 1997; Wright *et al.* 2004) should not be taken as evidence for a single dominant  
 83 axis of leaf functional variation (Osnas *et al.*, 2013; Lloyd *et al.*, 2013).

84 An important observation suggesting the presence of multiple axes of leaf functional  
 85 variation is that trait relationships across species are sometimes inconsistent with those  
 86 observed within species. For example, across species in the global flora, LMA has a strong,  
 87 positive relationship with LL but a weak relationship with net photosynthetic capacity per-  
 88 unit leaf area ( $A_{\text{area}}$ ) (Wright *et al.*, 2004). In contrast, intraspecific variation in these traits  
 89 across vertical canopy (light) gradients shows the opposite pattern: within species, LMA has  
 90 a weak and/or negative relationship with LL (Osada *et al.*, 2001; Lusk *et al.*, 2008; Russo &  
 91 Kitajima, 2016) but a strong, positive relationship with  $A_{\text{area}}$  (Ellsworth & Reich, 1993;  
 92 Kenzo *et al.*, 2006; Niinemets *et al.*, 2014). These contrasting patterns suggest that the causes  
 93 of LMA variation may be fundamentally different within vs. among species. Furthermore,  
 94 variation in four traits related to photosynthesis and metabolism – net photosynthetic  
 95 capacity, dark respiration rate, and concentrations of nitrogen and phosphorus – are primarily  
 96 mass-dependent among species within some plant functional groups, and primarily area-  
 97 dependent within others (Osnas *et al.*, in review). Thus, leaf trait relationships diverge in a  
 98 number of intra- and interspecific comparisons, suggesting the presence of multiple axes of  
 99 functional variation that can combine in different ways to create a variety of patterns.

100 A conceptual model that might explain these divergent patterns is to view LMA as  
 101 being comprised of two primary components – ‘photosynthetic’ leaf mass (LMA<sub>p</sub>, which  
 102 determines photosynthetic capacity and associated metabolic activity, such as phloem-

loading) and structural leaf mass (LMAs, which determines toughness and thus potential LL) (Osnas *et al.*, in review). This conceptual model can potentially explain the above divergent trait patterns, because variation in LMAp leads to mass-dependence of photosynthetic and metabolic traits, whereas variation in LMAs leads to area-dependence of these same traits (Notes S2). Thus, the degree of area- vs. mass-dependence in a given leaf assemblage should, according to this conceptual model, depend on the relative contributions of LMAp and LMAs to total LMA variation in the assemblage.

A challenge to implementing the above conceptual model is the absence of direct measurements of LMAp and LMAs. Although some leaf mass components are clearly associated with certain functions (e.g., chloroplasts perform photosynthesis), it is difficult to neatly partition some leaf mass components to specific functions. For example, thick cell walls provide structural toughness and allow for long LL (Kitajima *et al.*, 2012), but a leaf without any cell wall mass would lack the biomechanical support needed to intercept light and perform photosynthesis. Thus, it is difficult to determine how much of the cell wall mass present in a leaf was constructed for photosynthesis and associated metabolic functions, vs. how much additional cell wall mass was constructed for the purpose of prolonging LL. Despite this challenge, it should be possible to use multivariate trait datasets to statistically partition LMA into LMAp and LMAs, because statistical relationships among net photosynthetic capacity ( $A_{\max}$ ), dark respiration rate ( $R_{\text{dark}}$ ), LMA, and LL should hold clues regarding the allocation of leaf mass to photosynthetic vs. structural functions.

In this paper, we explore the above conceptual model using leaf trait data from two tropical forest sites (sun and shade leaves from wet and dry sites in Panama) and the GLOPNET global leaf traits database (Wright *et al.* 2004). For simplicity, our analysis assume that LMA is equal to the sum of separate additive components, LMAp and LMAs. The goal of our analysis is to evaluate if the conceptual model described above can explain divergent patterns in leaf trait data, and if so, to use the model to elucidate the causes of these divergent patterns. First, we describe a statistical modeling framework to estimate LMAp and LMAs, and we use simulations to show that the model yields robust results that are not prone to statistical artifacts. Then, we ask the following questions: (1) Does decomposing LMA into photosynthetic and structural components lead to improved predictions of  $A_{\max}$ ,  $R_{\text{dark}}$ , and LL? (2) What is the relative importance of LMAp vs. LMAs in explaining variation in LMA within and among species? (3) Do LMAp and LMAs differ between evergreen and deciduous species, and between sun and shade leaves? and (4) How are measurable leaf photosynthetic

and structural traits (e.g., concentrations of nitrogen and cellulose) related to LMAp and LMAs?

Our model is conceptually similar to that of Shipley *et al.* (2006), which explained the LES in terms of a tradeoff between the volume of a leaf allocated to cell wall vs. protoplasm. An important difference between our analysis and that of Shipley *et al.* (2006) is that our goal is to understand divergent trait patterns within vs. among species, whereas Shipley *et al.* (2006) focused only on interspecific variation. Because we treat LMA as the sum of LMAp and LMAs without considering how these mass components are packaged within a leaf, our model ignores the effects of leaf anatomy. For example, a given cell wall mass per leaf area may be packaged into a large surface area with thin walls (high mesophyll conductance and  $A_{\max}$ , but low structural toughness) or a small surface area with thick walls (low mesophyll conductance and  $A_{\max}$ , but high structural toughness) (Onoda *et al.*, 2017). Despite its lack of anatomical detail, our model explains much of the inter- and intraspecific variation in  $A_{\max}$ ,  $R_{\text{dark}}$ , and LL (see Results) and provides novel insights into the causes of divergent patterns of trait variation within vs. among species (see Discussion).

## Material and Methods

### Model overview

We developed a statistical modeling framework to partition LMA into additive LMAp and LMA components (see below and Notes S3). For sample  $i$  (where ‘sample’ refers to a species, or a species  $\times$  canopy position combination; see Datasets below), we partition  $LMA_i$  into  $LMA_{p_i} = f_i \times LMA_i$  and  $LMA_{s_i} = (1 - f_i) \times LMA_i$  by estimating a latent variable  $f_i$ . The latent variables  $f_i$  are not directly observed, but they can be constrained by available data using Bayesian methods (Bishop, 2006; Gelman & Hill, 2006). For example, posterior distributions for  $LMA_{p_i}$  should tend to converge on high values for leaves with high  $A_{\text{area}}$ , and posterior distributions for  $LMA_{s_i}$  should tend to converge on high values for leaves with high LL. Given the large number of free parameters (i.e., one latent variable per leaf sample), it is possible for the model to over-fit the data, which could lead to spurious inferences. Therefore, we performed tests with randomized data (see below) and with simulated data to evaluate model performance under a range of conditions (Notes S4). Tests with simulated data suggest that our modeling approach is robust and not prone to producing artefactual results.

## Modeling leaf lifespan, photosynthetic capacity, and dark respiration in relation to photosynthetic and structural leaf mass components

We assume that the sum of photosynthetic leaf mass per area (LMA<sub>p</sub>) and structural leaf mass per area (LMA<sub>s</sub>) is equal to total observed LMA for leaf sample  $i$  (where a ‘sample’ is a species in the GLOPNET dataset, or a species  $\times$  canopy position combination in the Panama dataset):

$$\text{LMA}_i = \text{LMA}_{p_i} + \text{LMA}_{s_i} \quad (1)$$

$$\text{LMA}_{p_i} = f_i \text{LMA}_i \quad (2)$$

$$\text{LMA}_{s_i} = (1 - f_i) \text{LMA}_i \quad (3)$$

where,  $f_i$  is the fraction of LMA <sub>$i$</sub>  that is comprised of LMA <sub>$p_i$</sub> . The  $f_i$  terms are not directly observed but can be estimated as latent variables in a Bayesian modeling framework (see details below). In our model, gross photosynthetic capacity (approximated here as the sum of  $A_{\text{area}}$  and  $R_{\text{area}}$ ) is determined by LMA <sub>$p_i$</sub> , LL is determined by LMA <sub>$s_i$</sub> , and total leaf dark respiration is the sum of respiration components due to photosynthetic and structural tissues:

$$E[\text{gross photosynthesis}] = E[A_{\text{area } i} + R_{\text{area } i}] = \alpha \text{LMA}_{p_i} = \alpha f_i \text{LMA}_i \quad (4)$$

$$E[\text{LL}_i] = \beta_1 \text{LMA}_{s_i} = \beta_1 (1 - f_i) \text{LMA}_i \quad (5, \text{Potential LL Model})$$

$$E[R_{\text{area } i}] = r_p \text{LMA}_{p_i} + r_s \text{LMA}_{s_i} = r_p f_i \text{LMA}_i + r_s (1 - f_i) \text{LMA}_i \quad (6)$$

where,  $E[\cdot]$  is the expected value of the variable in brackets,  $A_{\text{area } i}$ ,  $R_{\text{area } i}$ , and  $\text{LL}_i$ , are, respectively, the net photosynthetic rate ( $A_{\text{max}}$ ) per unit area, dark respiration rate ( $R_{\text{dark}}$ ) per unit area, and leaf life span of leaf  $i$ ;  $\alpha$  is net photosynthetic rate per unit photosynthetic mass;  $\beta_1$  is leaf lifespan per unit structural mass; and  $r_p$  and  $r_s$ , are, respiration rates per unit photosynthetic and structural leaf mass, respectively. Eq. 5 is labeled “Potential LL Model”, because this model assumes that LL is affected only by structural toughness (which we assume is proportional to LMA <sub>$s_i$</sub> ), in contrast to an alternative model based on optimal LL theory (see Eqs. 12-14 below). The logarithms of gross photosynthesis, LL, and  $R_{\text{area}}$  are assumed to have a multivariate normal distribution (MVN):

$$\begin{pmatrix} \ln [A_{\text{area } i} + R_{\text{area } i}] \\ \ln [\text{LL}_i] \\ \ln [R_{\text{area } i}] \end{pmatrix} \sim \text{MVN} \begin{pmatrix} \mu_{1i} \\ \mu_{2i}, \mathbf{\Sigma} \\ \mu_{3i} \end{pmatrix} \quad (7)$$

$$\mu_{1i} = \ln \alpha + \ln f_i + \ln \text{LMA}_i - \frac{\sigma_1^2}{2} \quad (8)$$

$$\mu_{2i} = \ln \beta_1 + \ln (1 - f_i) + \ln \text{LMA}_i - \frac{\sigma_2^2}{2} \quad (9)$$

$$\mu_{3i} = \ln [r_p f_i \text{LMA}_i + r_s (1 - f_i) \text{LMA}_i] - \frac{\sigma_3^2}{2} \quad (10)$$

$$\Sigma = \begin{pmatrix} \sigma_1^2 & \rho_{12}\sigma_1\sigma_2 & \rho_{13}\sigma_1\sigma_3 \\ \rho_{12}\sigma_1\sigma_2 & \sigma_2^2 & \rho_{23}\sigma_2\sigma_3 \\ \rho_{13}\sigma_1\sigma_3 & \rho_{23}\sigma_2\sigma_3 & \sigma_3^2 \end{pmatrix} \quad (11)$$

where  $\mu_{1-3}$  are, respectively, the expected values of  $\ln[A_{\text{area } i} + R_{\text{area } i}]$ ,  $\ln[LL_i]$ , and  $\ln[R_{\text{area } i}]$  (from Eqs. 4-6);  $\Sigma$  is the covariance matrix;  $\sigma_1$ ,  $\sigma_2$ , and  $\sigma_3$  are standard deviations of  $\mu_{1-3}$ ; and  $\rho_{12}$ ,  $\rho_{13}$ , and  $\rho_{23}$  are correlation coefficients among  $\mu_{1-3}$  (e.g., we expect positive covariance between  $\mu_1$  and  $\mu_3$  because both include  $R_{\text{area } i}$ ).

In addition to Eq. 5 (Potential LL Model), we considered an alternative assumption for the relationship between LL and other traits based on optimal LL theory (Kikuzawa, 1991; Kikuzawa *et al.*, 2004; 2013). According to this theory, the optimal leaf lifespan ( $LL_{\text{opt}}$ ) maximizes a leaf's lifetime carbon gain per-unit time, which is determined by potential LL, net photosynthetic rate, and construction cost per unit leaf area:

$$LL_{\text{opt}} = \sqrt{2bC/(a - m)} \quad (12)$$

where  $a$  is the realized (i.e., light-dependent) gross photosynthetic rate per unit leaf area,  $m$  is the realized daily respiration rate per unit leaf area,  $b$  is the rate of decline in photosynthetic capacity with leaf age (which determines potential LL in the Kikuzawa model), and  $C$  is the construction cost per unit leaf area. To implement this Optimal LL Model, we assumed that (i) potential LL is proportional to LMAs; and (ii) leaf construction cost per unit area (g glucose per unit leaf area) is proportional to LMA. Assumption (ii) is justified because leaf construction cost per unit mass (g glucose per unit leaf mass) is strongly conserved (Williams *et al.*, 1989; Villar & Merino, 2001). Thus, Eq. 12 can be written in terms of the traits considered in our analysis as:

$$\begin{aligned} E[LL_i] &= \beta_2 \sqrt{LMAs_i LMA_i / (\theta_L A_{\text{area } i} - R_{\text{area } i})} \\ &= \beta_2 \sqrt{(1 - f_i) LMA_i^2 / (\theta_L A_{\text{area } i} - R_{\text{area } i})} \end{aligned} \quad (13, \text{Optimal LL Model})$$

where  $\beta_2$  is a constant, and  $\theta_L$  ( $0 < \theta_L < 1$ ) is a scaling parameter that accounts for the effects of light availability on the realized photosynthetic rate (Kikuzawa *et al.*, 2004) (see Notes S3). The expected value of the logarithm of LL ( $\mu_{2i}$  in Eq. 7) for the Optimal LL Model is:

$$\mu'_{2i} = \ln \beta_2 + \ln LMA_i + \frac{1}{2} [\ln(1 - f_i) - \ln(\theta_L A_{\text{area } i} - R_{\text{area } i})] - \frac{\sigma_{f2}^2}{2}. \quad (14)$$

We fit the Optimal LL Model to the Panama data (see Methods/Datasets in main text), which includes both sun and shade leaves for 26 out of 106 total species. We set  $\theta_L = 1$  for sun leaves, and we fit  $\theta_L$  as a single free parameter assigned to all shade leaves. We considered versions of the Optimal LL Model both with and without an additional parameter



to account for differences in LL between the dry and wet sites due to mechanisms not included in the model (Notes S3).

## Datasets

To fit the models described above, we used LMA ( $\text{g m}^{-2}$ ), net photosynthetic capacity per unit leaf area ( $A_{\text{area}}$ ;  $\mu\text{mol s}^{-1} \text{m}^{-2}$ ), dark respiration rate per unit leaf area ( $R_{\text{area}}$ ;  $\mu\text{mol s}^{-1} \text{m}^{-2}$ ) and LL (months) from the GLOPNET global leaf traits database (Wright *et al.*, 2004) and from two tropical forest sites in Panama: Monumental Natural Metropolitano (MNM, “dry site”) and Bosque Protector San Lorenzo (SL, “wet site”). The Panama data include leaves sampled at two canopy positions (“sun”: full sun at the top of the canopy; and “shade”: well shaded, sampled within 2 m of the forest floor) from trees within reach of a canopy crane at each site. The dry MNM site is a semi-deciduous coastal Pacific forest with a 5-month dry season from December-April and 1740 mm of annual rainfall (Wright *et al.*, 2003). The MNM crane is 40 m tall with a 51 m long boom. The wet SL site is an evergreen Caribbean coastal forest with 3100 mm of annual rainfall (Wright *et al.* 2003). The SL crane is 52 m tall with a 54 m long boom.

After deleting leaf samples (i.e., database records, which typically average over multiple individual leaves) that lacked one of the four traits (LMA,  $A_{\text{area}}$ ,  $R_{\text{area}}$ , or LL), 198 samples for 198 unique species were available for GLOPNET, and 132 samples for 106 unique species were available for Panama (dry and wet sites combined; 26 species sampled in both sun and shade; no species with all four traits available at both sites). Both datasets include additional traits that we used to interpret model results, but which were not used to fit models. These traits include nitrogen and phosphorus content per leaf unit area ( $N_{\text{area}}$  and  $P_{\text{area}}$ ;  $\text{g m}^{-2}$ ) in both datasets, leaf habit in GLOPNET (deciduous or evergreen), and cellulose content per unit area ( $CL_{\text{area}}$ ;  $\text{g m}^{-2}$ ) in Panama.

We fit the Potential LL Model (Eq. 5) to both GLOPNET and Panama data. We fit the Optimal LL Model (Eq. 13; Notes S3) only to the Panama data because GLOPNET primarily represents interspecific variation among sun leaves, whereas the Optimal LL Model was motivated by the negative intraspecific LL-LMA relationship observed in Panama (Osnas *et al. in review*) and elsewhere (Lusk *et al.*, 2008).

## Parameter estimation



We used independent and non-informative prior distributions for all parameters, including latent variables  $f_i$  for each leaf sample. All priors were non-informative. The covariance matrix in Eq. 11 in main text was decomposed as  $\Sigma = \text{diag}(\sigma) \Omega \text{diag}(\sigma) = \text{diag}(\sigma) \mathbf{L} \mathbf{L}'$  using a Cholesky decomposition, where  $\sigma$  is a vector of  $\sigma_1$ ,  $\sigma_2$  and  $\sigma_3$ ;  $\Omega$  is a correlation matrix of  $\rho_{12}$ ,  $\rho_{13}$ , and  $\rho_{23}$ ; and  $\mathbf{L}$  is a lower triangular matrix. Instead of assigning prior distributions on  $\Sigma$  directly, priors were assigned on  $\sigma$  and  $\mathbf{L}$  to avoid a strong dependence between  $\sigma$  and  $\Omega$  (Lewandowski *et al.*, 2009; Alvarez *et al.*, 2016). A prior for  $\mathbf{L}$  was specified as a so-called LKJ distribution with shape parameter 1 (Lewandowski *et al.*, 2009), which is identical to a uniform distribution on the space of correlation matrices. Priors for  $\sigma$  were specified as uniform distributions with range (0, 10,000). Priors for  $\alpha$ ,  $\beta_1$ ,  $\beta_2$ ,  $r_p$  and  $r_s$  in Eqs. 4-6, 8-10, and 13-14 were specified as normal distributions with mean 0 and variance 10,000. Priors for  $f_i$  in Eqs. (2, 3, 8-10, 14), and  $\theta_L$  in Eqs. (13-14) were specified as uniform distributions with range (0, 1).

Alternative priors for  $f_i$  were considered, but none were presented as main results, because the alternative priors produced statistical artifacts (Notes S4). In order to constrain the latent variables in our model, a natural choice is to implement hyper-parameters to describe prior means of the latent variables (e.g., different prior means of  $f_i$  for deciduous vs evergreen leaves). However, analyses of simulated data suggest that using hyper-parameters in our model results in biased inference for  $f_i$  as well as regression parameters (Notes S4).

Models were fit using the Hamiltonian Monte Carlo algorithm (HMC) implemented in Stan (Carpenter *et al.*, 2016). Posterior estimates were obtained from three independent chains of 20,000 iterations after a burn-in of 10,000 iterations, thinning at intervals of 20. The Stan code used to fit models are available from Github at:

<https://github.com/mattocci27/LMApLMAs>. Convergence of the posterior distribution was assessed with the Gelman-Rubin statistic with a convergence threshold of 1.1 for all diagnostics (Gelman *et al.*, 2014a).

## Model selection

Alternative LL models (Eqs. 5 and 13; see also Notes S3) fit to Panama data were compared using the WAIC (Watanabe-Akaike information criterion) (Watanabe, 2010; Gelman *et al.*, 2014b). WAIC is a predictive information criterion for Bayesian models, with lower values indicating a more parsimonious model (Gelman *et al.*, 2014b). Compared to AIC (Akaike, 1973) and DIC (Spiegelhalter *et al.*, 2002), WAIC has the desirable property of averaging

over the posterior distribution rather than conditioning on a point estimate (Gelman *et al.*, 2014b).

## Variance partitioning

We used the following identity to estimate the relative contributions of LMAp and LMAs to LMA variance, where again  $LMA = LMAp + LMAs$ :

$$\text{Var}(Y = X1 + X2) = \text{Cov}(Y, X1 + X2) = \text{Cov}(Y, X1) + \text{Cov}(Y, X2) \quad (15)$$

Thus, the fractions of total LMA variance due to variance in LMAp and LMAs were determined by the covariances  $\text{Cov}(LMA, LMAp)$  and  $\text{Cov}(LMA, LMAs)$ , respectively, taken as proportions of the total variance  $\text{Var}(LMA)$ . Tests with simulated data confirm that our modeling approach can effectively partition LMA variance into LMAp and LMAs components (Notes S4).

## Randomized LMA datasets

Because our statistical approach includes one latent variable  $f_i$  to partition LMA into LMAp and LMAs for each leaf sample, one might expect a good match between predictions and observations simply due to the large number of free parameters, whether or not the model captured important biological mechanisms. To evaluate model performance while controlling for the number of free parameters, we compared the fit of our model to observed and randomized datasets. Specifically, we generated randomized datasets by randomizing LMA values across species, while maintaining the original (non-randomized) data for  $A_{\text{area}}$ ,  $R_{\text{area}}$  and LL. Thus, the randomized LMA datasets had zero expected covariance between LMA and other traits, but maintained the observed covariances among  $A_{\text{area}}$ ,  $R_{\text{area}}$  and LL. If the fit between model and data depended primarily on the number of parameters or other model assumptions, then we would expect similar fits for the original (non-randomized) and randomized LMA datasets. For the Panama dataset, which includes two sites (wet and dry) and two canopy strata (sun and shade), we also considered constrained randomizations in which LMA was randomized across canopy strata within each site. We generated 10 randomized datasets for each analysis. Analyzing a larger number of randomized datasets (e.g., 1000) was impractical given our computationally intensive Bayesian modeling approach.

To compare model results obtained from the observed (non-randomized) dataset to those obtained from the randomized datasets, we calculated the standardized effect size (SES) for correlations of interest (e.g., between LMAp and  $A_{\text{area}}$ , or between LMAs and LL) as SES

$= (r_{\text{obs}} - r_{\text{rand}})/\text{SD}_{\text{rand}}$ , where  $r_{\text{obs}}$  is the Pearson correlation coefficient of interest for the observed dataset, and  $r_{\text{rand}}$  and  $\text{SD}_{\text{rand}}$  are the mean and standard deviation, respectively, of the corresponding correlation coefficients for the randomized datasets. Under the null hypothesis of equal correlations for the observed and randomized data, the distribution of SES is approximately standard normal (Gotelli & Rohde, 2002), which we assumed when calculating  $P$ -values. A significant difference ( $P < 0.05$ ) indicates that the correlation inferred from the observed dataset is different from what would be expected to emerge from model assumptions and free parameters.

## Results

### 1. Photosynthetic and structural LMA components (LMAp and LMAs, respectively) can be accurately estimated.

Tests with simulated data show that our modeling approach can accurately partition LMA into LMAp and LMAs, except in cases where the assumed relationships (e.g., between LMAp and  $A_{\text{area}}$ , and between LMAs and LL) are weak (Notes S4). However, tests with simulated data also show that the LMA-randomization test we implemented can effectively diagnose these weak-correlation cases (Notes S4). Therefore, in all cases presented below where results based on observed data are significantly different ( $P < 0.05$ ) than results based on randomized data, we assume that estimates of LMAp and LMAs (Eqs. 1-3) are accurate and that the results reflect meaningful patterns in the data.

### 2. Nearly all leaf dark respiration is associated with photosynthetic leaf mass.

Photosynthetic mass (LMAp) accounted for nearly all leaf dark respiration; i.e., estimated dark respiration rate per-unit structural mass ( $r_s$ ) was close to zero in analyses of both GLOPNET and Panama data (Table S1). Thus, although building costs are likely similar for different leaf chemical components and tissues (Williams *et al.*, 1989; Villar & Merino, 2001), our results suggest that leaf mass associated with photosynthetic function accounts for nearly all leaf maintenance respiration.

### 3. Decomposing LMA into photosynthetic and structural components leads to improved predictions of $A_{\text{area}}$ , $R_{\text{area}}$ and LL.

For the GLOPNET global dataset,  $A_{\text{area}}$  had a strong positive correlation with LMAp, a weak negative correlation with LMAs, and a non-significant correlation with total LMA (Figs. 1a-c; Table S2).  $A_{\text{area}}$  was also positively correlated with LMAp in the randomized datasets (in

which LMA was randomized among leaves in GLOPNET; see gray symbols in Fig. 1), but these correlations were weaker than those obtained from the observed data ( $P < 0.001$  for the null hypothesis of equal correlation in observed and randomized datasets).  $R_{\text{area}}$  in GLOPNET also had a strong positive correlation with LMAp, which was stronger than the correlation between  $R_{\text{area}}$  and LMAp in the randomized datasets ( $P < 0.001$ ), or between  $R_{\text{area}}$  and either LMA or LMAs (Figs. 1d-f). Finally, LL in GLOPNET had a strong positive correlation with LMAs, which was stronger than the correlation between LL and LMAs from the randomized datasets ( $P < 0.001$ ) or between LL and either LMA or LMAp (Figs. 1g-i).

For the Panama dataset, we evaluated multiple models due to the availability of both sun and shade leaves. The Optimal LL Model (Eq. 13) fit the data better than the Potential LL Model (Eq. 5) according to the Watanabe-Akaike information criterion (WAIC; Table S1). Including site effects in the Optimal LL Model further improved the WAIC but led to similar parameter estimates and inferences (Table S1-3). All Panama results we report are for the Optimal LL Model with site effects unless stated otherwise.  $A_{\text{area}}$  and  $R_{\text{area}}$  had stronger and more positive correlations with LMAp than with LMA or LMAs (Figs. 2a-f and Table S3). LL was not significantly correlated with LMA when all leaves were combined, but was strongly correlated with LMA for shade leaves at the dry site (Fig. 2g). The correlation between LL and LMAp was similar for observed and randomized datasets (Fig. 2h; Table S3), implying a lack of meaningful correlation between LL and LMAp in the Panama data. The correlation between LL and LMAs was weaker in observed than in randomized data (Fig. 2i) because the LL vs. LMAs relationship ignores important factors in the Optimal LL Model (e.g., effects of light on realized photosynthetic rates and thus optimal LL). The correlation between predicted and observed LL was higher in the Optimal LL Model ( $r = 0.81$ ) than for randomized datasets ( $P < 0.001$ ), and also stronger than for the Potential LL Model ( $r = 0.38$ ) (Fig. 3; Table S4).

#### **4. Most interspecific LMA variation is due to variation in structural leaf mass, not photosynthetic leaf mass.**

LMAs accounted for the majority of interspecific variation in LMA among all leaves in GLOPNET (74.7%), among sun leaves in Panama (57.8%), and among shade leaves in Panama (86.0%) (Fig. 4).

#### **5. Evergreen leaves have greater LMAs than deciduous leaves, and sun leaves have both greater LMAp and LMAs than shade leaves.**

In the GLOPNET dataset, evergreen leaves had significantly higher LMAs than deciduous leaves, but the two groups had similar LMAp (Fig. 5). Thus, the higher total LMA in evergreen leaves in GLOPNET was primarily due to differences in LMAs (which comprised a greater fraction of LMA in evergreen than in deciduous leaves; Fig. S1a). Similar results were obtained for the Panama dataset (evergreen leaves have higher LMAs but similar LMAp compared to deciduous leaves; Fig. S1b). In the Panama dataset, both LMAp and LMAs were significantly higher in sun leaves than in shade leaves (Fig. 5). Thus, in contrast to interspecific variation in LMA (which is primarily driven by variation in LMAs; Fig. 4), intraspecific variation in LMA reflects changes in both LMAs and LMAp.

**6. Nitrogen and phosphorus per-unit leaf area are strongly correlated with LMAp, and cellulose per-unit leaf area is strongly correlated with LMAs.** In the GLOPNET dataset,  $N_{\text{area}}$  and  $P_{\text{area}}$  had strong positive correlations with LMAp, but only weak correlations with LMAs (Fig. S3). Similarly, in the Panama dataset,  $N_{\text{area}}$  and  $P_{\text{area}}$  had strong positive correlations with LMAp, but were not correlated with LMAs (Fig. 6). In contrast, cellulose per-unit leaf area ( $CL_{\text{area}}$ ), which was available for the Panama dataset but not for GLOPNET, had a strong positive correlation with LMAs, and a weak positive correlation with LMAp (Fig. 6).  $CL_{\text{area}}$  was more strongly correlated with LMA than with LMAp or LMAs, but sun and shade leaves aligned along a common  $CL_{\text{area}}$ -LMAs relationship, as opposed to being offset for LMA and LMAp (Figs. 6g-i). The above correlations ( $N_{\text{area}}$  and  $P_{\text{area}}$  with LMAp, and  $CL_{\text{area}}$  with LMAs) were stronger than those based on randomized datasets ( $P < 0.001$  in all cases, Fig. 6 and Fig. S3).

## Discussion

Our analyses demonstrate that decomposing LMA variation into separate photosynthetic and structural components (LMAp and LMAs, respectively) leads to improved predictions of photosynthetic capacity ( $A_{\text{max}}$ ), dark respiration rate ( $R_{\text{dark}}$ ), and leaf lifespan (LL), as well as clear relationships with traits used for independent model evaluation (nitrogen, phosphorus, and cellulose concentrations). Tests with simulated data suggest that our results are robust and reflect meaningful, previously unreported patterns in leaf trait data. Below, we elaborate on the insights gained from our analysis and the implications of our results for the representation of leaf functional diversity in global ecosystem models.

Decomposing LMA into LMAp and LMAs provides insights into why interspecific variation in leaf traits related to photosynthesis and metabolism are primarily area-dependent

(i.e., primarily independent of LMA when expressed per-unit area) rather than mass-dependent (see Notes S1-2 and Osnas *et al.* 2013 for explanation of trait mass- vs. area-dependence). Specifically, our results suggest that most interspecific LMA variation across the global flora and across tropical tree species in Panama is due to variation in leaf mass components that contribute to LL but not to  $A_{\max}$  (Fig. 4). An illustrative case is the comparison of evergreen and deciduous leaves in the global flora: according to our model results, evergreen leaves have greater LMAs (and thus greater LL) but similar LMA<sub>p</sub> (and thus similar  $A_{\text{area}}$ ) compared to deciduous leaves (Figs. 1 and 5). This comparison illustrates why interspecific LMA variation is largely unrelated to area-based  $A_{\max}$ , which in turn explains trait area-dependence (Notes S1-2). Consistent with this explanation, the assemblage we examined where LMAs accounted for the highest fraction of total LMA variation (86% for Panama shade leaves; Fig. 4) is also the assemblage with the highest degree of trait area-dependence (Osnas *et al.* in review).

Decomposing LMA also provides insights as to why intraspecific patterns of trait variation differ from those observed across species. In contrast to interspecific LMA variation, our analysis suggests that LMA<sub>p</sub> contributes half or more of the intraspecific increase in LMA from shade to sun (Figs. 5 and S1). The increase in LMA<sub>p</sub> from shade to sun – which likely reflects an increase in the size and number of palisade mesophyll cells with increasing light availability (Onoda *et al.*, 2008; Terashima *et al.*, 2011) – is also associated with an increase in LMAs from shade to sun (Fig. 5). This positive covariance between LMA<sub>p</sub> and LMAs within species means that per-area values of LMA<sub>p</sub>-dependent traits (e.g.,  $A_{\text{area}}$ ) have a strong, positive relationship with total LMA, which implies trait mass-dependence (Notes S1-2). In contrast, because interspecific variation in LMA is due primarily to variation in LMAs rather than LMA<sub>p</sub>, LMA<sub>p</sub>-dependent traits (when expressed per-unit area) are largely independent of LMA across species, which implies trait area-dependence (Notes S1-2).

Finally, decomposing LMA provides insights into the intraspecific LL ‘counter-gradient’ (Osada *et al.* 2001; Lusk *et al.* 2008; Russo & Kitajima 2016), whereby LL decreases as LMA increases from shade to sun within species, which contrasts with positive interspecific LL-LMA relationships within a single light environment. Decomposing LMA into LMA<sub>p</sub> and LMAs suggests that the decline in photosynthetic rate from sun to shade (which increases optimal LL from a carbon-gain perspective; Kikuzawa 1991) is sufficient to produce an intraspecific counter-gradient, because a counter-gradient occurs at the dry Panama site (6 vs. 8 months for sun vs. shade LL means) despite no change in the structural



leaf mass fraction (LMAs/LMA) from sun to shade (see LMA<sub>p</sub>/LMA values in Fig. S1c, with LMAs/LMA = 1 – LMA<sub>p</sub>/LMA). However, the counter-gradient is stronger at the wet Panama site (11 vs. 31 months for sun vs. shade LL means), where LMAs/LMA is significantly higher for shade leaves than for sun leaves (see LMA<sub>p</sub>/LMA in Fig. S1c). Thus, at the wet Panama site, changes in LMAs/LMA from sun to shade appear to strengthen the counter-gradient. The potential for LMAs/LMA to enhance the counter-gradient is corroborated by data on cellulose percent mass, which is similar in shade and sun at the Panama dry site (Fig. S4b; as observed by Lusk *et al.* 2010), but higher in shade than sun at the wet site (Fig. S4b; as observed by Kitajima *et al.*, 2016). In summary, the decrease in optimal LL with increasing light (Kikuzawa 1991) appears sufficient by itself to create a LL counter-gradient, but the counter-gradient appears to be enhanced in some assemblages by greater structural mass fractions in shade vs. sun leaves.

The improved predictions and understanding provided by decomposing LMA into photosynthetic and structural components challenge the view that leaf functional diversity can be accurately represented by a single leaf economics spectrum (LES) axis (Wright *et al.* 2004). Lloyd *et al.* (2013) argued that the apparent dominance of a single LES axis is an artifact of expressing area-dependent leaf traits on a per-mass basis, and Osnas *et al.* (2013) demonstrated that across the global flora, traits related to photosynthesis and metabolism are indeed area-dependent. Intraspecific patterns in trait variation, which contrast with interspecific patterns, pose additional challenges for a one-dimensional view of leaf functional diversity. Our analysis shows that considering two primary axes of leaf trait variation (photosynthesis and structure) provides improved quantitative predictions and insights compared to a single LES. Our results point to a simple two-dimensional framework for representing leaf functional diversity in global ecosystem models: a LMA<sub>p</sub> axis that determines  $A_{\max}$ , accounts for nearly all  $R_{\text{dark}}$  (see  $r_p$  and  $r_s$  estimates in Table S1), and affects LL as predicted by optimality theory (Kikuzawa 1992); and a LMAs axis that determines potential LL through its effects on leaf toughness (Kitajima *et al.* 2012). In the datasets we analyzed (the global flora and tropical trees in Panama), these two axes are only weakly correlated with each other (Fig. S5), which suggests that trait-based approaches to global ecosystem modeling (Scheiter *et al.*, 2013; Wullschleger *et al.*, 2014) could consider these as independent axes.

Our statistical decomposition of LMA into photosynthetic and structural components provides important insights (summarized above), but additional insights and accuracy could be gained by a more mechanistic modeling approach. For example, John *et al.* (2017)



decomposed interspecific LMA variation into anatomical components such as the size, number of layers, and mass density of cells in different leaf tissues. If such detailed information became available for a large number of leaves, representing both intra- and interspecific variation, it should be possible to quantify how these anatomical traits scale up to leaf-level  $A_{\max}$ ,  $R_{\text{dark}}$ , and LL. A simpler alternative would be to modify our model (see methods) to account for variation in cell wall thickness ( $T_{\text{CW}}$ ): for a given cell size, increasing  $T_{\text{CW}}$  would lead to an increase in lamina density, cellulose per volume, toughness, and LL (Kitajima and Poorter 2010; Kitajima *et al.* 2012, 2016), and a decrease in mesophyll conductance and  $A_{\max}$  (Evans *et al.*, 2009; Terashima *et al.*, 2011; Onoda *et al.*, 2017).

## Conclusions

It is widely recognized that LMA variation is associated with multiple tissues and functions, including metabolically active mesophyll that largely determines photosynthetic capacity, as well as structural and chemical components that contribute primarily to leaf toughness and defense (Roderick *et al.*, 1999; Shipley *et al.*, 2006; Lusk *et al.*, 2010). It should not be surprising then, that partitioning LMA into photosynthetic and structural components yields enhanced predictions and improved understanding of patterns of leaf trait variation both within and among species. Yet for over a decade, the vast literature on leaf traits has been strongly influenced by the view that leaf trait variation can usefully be represented by a single LES axis. Our results provide quantitative evidence that this one-dimensional view of leaf trait variation is insufficient, and our model provides a biological explanation for previous statistical analyses that have demonstrated area-dependence of leaf traits across species (Osnas *et al.* 2013), while also explaining mass-dependence within species. Our results suggest that most of the interspecific variation in LMA concerns structural mass that contributes to LL but not to photosynthetic capacity, and that structural and photosynthetic LMA components are only weakly correlated across species. Thus, strong interspecific correlations between LMA and mass-normalized photosynthetic capacity (and related traits, such as respiration rate, and nitrogen and phosphorus concentrations) are likely driven by mass-normalization itself, rather than any functional dependence of these photosynthetic and metabolic traits on LMA (Lloyd *et al.* 2013, Osnas *et al.* 2013). In contrast, intraspecific variation in LMA is driven by coordinated changes in structural and photosynthetic mass components, which explains why mass-normalized photosynthetic and metabolic traits vary little from sun to shade within species (Aranda *et al.*, 2004; Poorter *et al.*, 2006; Niinemets *et al.*, 2014).

531

## 532 **Acknowledgments**

533 We thank Jonathan Dushoff for statistical advice and Martijn Slot for helpful comments that  
534 improved the paper. Mirna Samaniego and Milton Garica provided indispensable assistance  
535 in data collection. We thank the Smithsonian Tropical Research Institute (STRI), the  
536 Tropical Canopy Biology Program at STRI and the Andrew W. Mellon Foundation for  
537 supporting this work. MK was supported by a Postdoctoral Fellowship for Research Abroad  
538 from the Japan Society for the Promotion of Science.

539

## 540 **Author contributions:**

541 MK, JWL and JLDO conceived of the study; KK, SJW and SAVB contributed data; MK  
542 devised the analytical approach and performed analyses; MK and JWL wrote the first draft of  
543 the manuscript, and all authors contributed to revisions.

544

## 545 **References**

- 546 **Akaike H. 1973.** Information theory and an extension of the maximum likelihood  
547 principle. Petrov BN, Csaki F eds. *Akadémiai Kiado*, 267–281.
- 548 **Alvarez I, Niemi J, Simpson M. 2016.** Bayesian Inference for a Covariance Matrix. *arXiv*  
549 *preprint arXiv:1408.4050v2*: 1–12.
- 550 **Aranda I, Pardo F, Gil L, Pardos JA. 2004.** Anatomical basis of the change in leaf mass  
551 per area and nitrogen investment with relative irradiance within the canopy of eight  
552 temperate tree species. *Acta Oecologica* **25**: 187–195.
- 553 **Bishop CM. 2006.** Pattern Recognition and Machine Learning.
- 554 **Bonan GB, Levis S, Kergoat L, Oleson KW. 2002.** Landscapes as patches of plant  
555 functional types: An integrating concept for climate and ecosystem models. *Global*  
556 *Biogeochemical Cycles* **16**: 5–15–23.
- 557 **Carpenter B, Gelman A, Hoffman M, Lee D, Goodrich B. 2016.** Stan: A probabilistic  
558 programming language. *J Stat Softw.*
- 559 **Ellsworth DS, Reich PB. 1993.** Canopy structure and vertical patterns of photosynthesis and  
560 related leaf traits in a deciduous forest. *Oecologia*.
- 561 **Evans JR, Kaldenhoff R, Genty B, Terashima I. 2009.** Resistances along the CO<sub>2</sub>  
562 diffusion pathway inside leaves. *Journal of Experimental Botany* **60**: 2235–2248.
- 563 **Gelman A, Hill J. 2006.** Data analysis using regression and multilevel/hierarchical models.
- 564 **Gelman A, Carlin JB, Stern HS, Dunson DB, Vehtari A, Rubin DB. 2014a.** *Bayesian*

- 565 *Data Analysis, Third Edition*. Taylor & Francis.
- 566 **Gelman A, Hwang J, Vehtari A. 2014b**. Understanding predictive information criteria for  
567 Bayesian models. *Statistics and Computing* **24**: 997–1016.
- 568 **Gotelli N, Rohde K. 2002**. Co-occurrence of ectoparasites of marine fishes: a null model  
569 analysis. *Ecology Letters* **5**: 86–94.
- 570 **John GP, Scoffoni C, Buckley TN, Villar R, Poorter H, Sack L. 2017**. The anatomical and  
571 compositional basis of leaf mass per area. *Ecology Letters*.
- 572 **Kenzo T, Ichie T, Watanabe Y, Yoneda R, Ninomiya I, Koike T. 2006**. Changes in  
573 photosynthesis and leaf characteristics with tree height in five dipterocarp species in a  
574 tropical rain forest. *Tree Physiology* **26**: 865–873.
- 575 **Kikuzawa K. 1991**. A cost-benefit analysis of leaf habit and leaf longevity of trees and their  
576 geographical pattern. *The American Naturalist*: 1250–1263.
- 577 **Kikuzawa K, Onoda Y, Wright IJ, Reich PB. 2013**. Mechanisms underlying global  
578 temperature-related patterns in leaf longevity. *Global Ecology and Biogeography*.
- 579 **Kikuzawa K, Shirakawa H, Suzuki M, Umeki K. 2004**. Mean labor time of a leaf.  
580 *Ecological Research* **19**: 365–374.
- 581 **Kitajima K, Llorens A-M, Stefanescu C, Timchenko MV, Lucas PW, Wright SJ. 2012**.  
582 How cellulose-based leaf toughness and lamina density contribute to long leaf  
583 lifespans of shade-tolerant species. *New Phytologist* **195**: 640–652.
- 584 **Kitajima K, Wright SJ, Westbrook JW. 2016**. Leaf cellulose density as the key  
585 determinant of inter- and intra-specific variation in leaf fracture toughness in a  
586 species-rich tropical forest. *Interface Focus* **6**: 20150100–9.
- 587 **Lewandowski D, Kurowicka D, Joe H. 2009**. Generating random correlation matrices based  
588 on vines and extended onion method. *Journal of Multivariate Analysis* **100**: 1989–  
589 2001.
- 590 **Lloyd J, Bloomfield K, Domingues TF, Farquhar GD. 2013**. Photosynthetically relevant  
591 foliar traits correlating better on a mass vs an area basis: of ecophysiological  
592 relevance or just a case of mathematical imperatives and statistical quicksand? *New*  
593 *Phytologist* **199**: 311–321.
- 594 **Lusk C, Onoda Y, Kooyman R, Gutiérrez-Girón A. 2010**. Reconciling species-level vs  
595 plastic responses of evergreen leaf structure to light gradients: shade leaves punch  
596 above their weight. *New Phytologist* **186**: 429–438.
- 597 **Lusk CH, Reich PB, Montgomery RA, Ackerly DD, Cavender-Bares J. 2008**. Why are

598 evergreen leaves so contrary about shade? *Trends in Ecology & Evolution* **23**: 299–  
599 303.

600 **Niinemets Ü, Keenan TF, Hallik L. 2014.** A worldwide analysis of within-canopy  
601 variations in leaf structural, chemical and physiological traits across plant functional  
602 types. *New Phytologist* **205**: 973–993.

603 **Onoda Y, Schieving F, Anten NPR. 2008.** Effects of light and nutrient availability on leaf  
604 mechanical properties of *Plantago major*: a conceptual approach. *Annals of botany*  
605 **101**: 727–736.

606 **Onoda Y, Wright IJ, Evans JR, Hikosaka K, Kitajima K, Niinemets Ü, Poorter H,**  
607 **Tosens T, Westoby M. 2017.** Physiological and structural tradeoffs underlying the  
608 leaf economics spectrum. *New Phytologist*.

609 **Osada N, Takeda H, Furukawa A, Awang M. 2001.** Leaf dynamics and maintenance of  
610 tree crowns in a Malaysian rain forest stand. *Journal of Ecology* **89**: 774–782.

611 **Osnas JLD, Lichstein JW, Reich PB, Pacala SW. 2013.** Global Leaf Trait Relationships:  
612 Mass, Area, and the Leaf Economics Spectrum. *Science* **340**: 741–744.

613 **Poorter H, Pepin S, Rijkers T, de Jong Y, Evans JR, Körner C. 2006.** Construction costs,  
614 chemical composition and payback time of high- and low-irradiance leaves. *Journal*  
615 *of Experimental Botany* **57**: 355–371.

616 **Reich PB. 2014.** The world-wide ‘fast-slow’ plant economics spectrum: a traits manifesto (H  
617 Cornelissen, Ed.). *Journal of Ecology* **102**: 275–301.

618 **Reich PB, Walters MB, Ellsworth DS. 1997.** From tropics to tundra: global convergence in  
619 plant functioning. *Proceedings of the National Academy of Sciences* **94**: 13730–  
620 13734.

621 **Roderick ML, Berry SL, Noble IR, Farquhar GD. 1999.** A theoretical approach to linking  
622 the composition and morphology with the function of leaves. *Functional Ecology* **13**:  
623 683–695.

624 **Russo SE, Kitajima K. 2016.** The Ecophysiology of Leaf Lifespan in Tropical Forests:  
625 Adaptive and Plastic Responses to Environmental Heterogeneity. Goldstein G,  
626 Santiago SL eds. *Tropical Tree Physiology: Adaptations and Responses in a Changing*  
627 *Environment. Tropical Tree Physiology.* Cham: Springer International Publishing,  
628 357–383.

629 **Scheiter S, Langan L, Higgins SI. 2013.** Next-generation dynamic global vegetation  
630 models: learning from community ecology. *New Phytologist* **198**: 957–969.

631 **Shipley B, Lechowicz M, Wright I, Reich P. 2006.** Fundamental trade-offs generating the

- worldwide leaf economics spectrum. *Ecology* **87**: 535–541.
- Spiegelhalter DJ, Best NG, Carlin BP, Van Der Linde A. 2002.** Bayesian measures of model complexity and fit. *Journal of the Royal Statistical Society: Series B (Statistical Methodology)* **64**: 583–639.
- Terashima I, Hanba YT, Tholen D, Niinemets Ü. 2011.** Leaf functional anatomy in relation to photosynthesis. *Plant Physiology* **155**: 108–116.
- Villar R, Merino J. 2001.** Comparison of leaf construction costs in woody species with differing leaf life-spans in contrasting ecosystems. *New Phytologist*.
- Watanabe S. 2010.** Asymptotic Equivalence of Bayes Cross Validation and Widely Applicable Information Criterion in Singular Learning Theory. *The Journal of Machine Learning Research* **11**: 3571–3594.
- Westoby M, Wright IJ. 2006.** Land-plant ecology on the basis of functional traits. *Trends in Ecology & Evolution* **21**: 261–268.
- Williams K, Field CB, Mooney HA. 1989.** Relationships among leaf construction cost, leaf longevity, and light environment in rain-forest plants of the genus *Piper*. *The American Naturalist*.
- Wright IJ, Reich PB, Westoby M, Ackerly DD, Baruch Z, Bongers F, Cavender-Bares J, Chapin T, Cornelissen J, Diemer M, et al. 2004.** The worldwide leaf economics spectrum. *Nature* **428**: 821–827.
- Wright SJ, Horlyck V, Basset Y, Barrios H, Bethancourt A, Bohlman SA, Gilbert GS. 2003.** Tropical Canopy Biology Program, Republic of Panama. Basset Y, Horlyck V, Wright SJ eds. Studying Forest Canopies from Above: The International Canopy Crane Network. Panama, 137–155.
- Wullschleger SD, Epstein HE, Box EO, Euskirchen ES, Goswami S, Iversen CM, Kattge J, Norby RJ, van Bodegom PM, Xu X. 2014.** Plant functional types in Earth system models: past experiences and future directions for application of dynamic vegetation models in high-latitude ecosystems. *Annals of botany* **114**: 1–16.

## Supporting information

**Notes S1** Defining and understanding leaf trait mass- vs. area-dependence.

**Notes S2** Implications of photosynthetic and structural leaf mass for trait mass- vs. area-dependence.

**Notes S3** Alternative leaf lifespan models and realized net photosynthesis.

**Notes S4** Model tests with simulated data.

**Fig. S1** Boxplots comparing posterior means of the latent variable  $f$  (the fraction of total LMA comprised by LMAp) across deciduous (D) and evergreen (E) leaves in GLOPNET and Panama, and across sites (wet and dry) and canopy strata (sun and shade) in Panama.

**Fig. S2** Boxplots comparing leaf mass per area (LMA), photosynthetic leaf mass per area (LMAp; posterior means), and structural leaf mass per area (LMAs; posterior means) across sites (wet and dry) and canopy strata (sun and shade) in all leaves in the Panama datasets.

**Fig. S3** Measured traits related to photosynthesis and metabolism (nitrogen and phosphorus per-unit leaf area;  $N_{\text{area}}$  and  $P_{\text{area}}$ ) are positively correlated with LMA and with estimates (posterior means) of the photosynthetic and structural LMA components (LMAp and LMAs, respectively) in the GLOPNET dataset.

**Fig. S4** Boxplots comparing cellulose content (percent of total leaf mass) across sites (wet and dry) and canopy strata (sun and shade) in Panama.

**Fig. S5** Posterior means of LMAp vs LMAs in the (a) GLOPNET and (b) Panama datasets.

**Table S1** Summary of results for Potential LL Model (Eq. 5) and Optimal LL Models (Notes S3).

**Table S2** Correlations between LMAp or LMAs and other traits derived from the Potential LL model (Eq. 5) fit to GLOPNET data.

**Table S3** Correlations between LMAp or LMAs and other traits derived from the three alternative LL models (Notes S3) fit to Panama data.

**Table S4** Correlations between observed and predicted LL for the Potential LL Model (Eq. 5) and the Optimal LL Model (Notes S3) fit to Panama data.



## Figure legends

**Fig. 1** Observed and estimated leaf-trait relationships in the global GLOPNET dataset. Leaf life span (LL), net photosynthetic rate per unit leaf area ( $A_{\text{area}}$ ), and dark respiration rate per unit leaf area ( $R_{\text{area}}$ ) are plotted against observed LMA and estimates (posterior means) of photosynthetic and structural LMA components (LMA<sub>p</sub> and LMA<sub>s</sub>, respectively). Gray symbols show 1 of 10 randomized datasets, in which LMA was randomized among all leaves in the GLOPNET dataset we analyzed (which includes all leaves for which LMA,  $A_{\text{area}}$ ,  $R_{\text{area}}$ , and LL were available). Pearson correlation coefficients are for observed LMA (left column) and posterior means of LMA<sub>p</sub> (middle column) and LMA<sub>s</sub> (right column).  $P$ -values (\*\*  $P < 0.01$ ; \*\*\*  $P < 0.001$ ) for LMA test the null hypothesis of zero correlation, and for LMA<sub>p</sub> and LMA<sub>s</sub> test the null hypothesis of equal correlation in observed and randomized datasets (see ‘Randomized LMA Datasets’ in Methods for details). In some cases,  $r_{\text{obs}}$  is near zero but significantly greater than  $r_{\text{rand}}$  because  $r_{\text{rand}}$  is negative (see Table S2 for details).

**Fig. 2** Observed and estimated leaf-trait relationships in the Panama dataset. Estimates are from the Optimal LL Model with site effects (Eq. 13 and Notes S3). Details as in Fig. 1, except that in the randomized dataset shown here (gray symbols), LMA was randomized within sites (wet and dry) across canopy strata (sun and shade). Results for other LL models are summarized in Table S3.

**Fig. 3** Observed vs. predicted leaf lifespan (LL) in the (a) Potential LL Model (Eq. 5) and (b) Optimal LL Model with site effects (Eq. 13 and Notes S3). Predicted LL values are posterior means. The dashed line indicates the 1:1 relationship. Gray symbols show predicted LL values from 1 of 10 randomized LMA datasets for each model. Pearson correlation coefficients are for predictions derived from the observed datasets, and  $P$ -values (\*\*\*  $P < 0.001$ ) are for the null hypothesis of equal correlation in observed and randomized datasets (see ‘Randomized LMA Datasets’ in Methods for details). Results for other LL models are reported in Table S4.

**Fig. 4** Percent of interspecific variation in leaf mass per area (LMA) explained by photosynthetic and structural components of LMA (LMA<sub>p</sub> and LMA<sub>s</sub>, respectively) for the global GLOPNET dataset (GL), sun leaves in Panama (PA Sun), and shade leaves in Panama (PA Shade). Variance was partitioned by applying Eq. 15 to posterior means of LMA<sub>p</sub> and LMA<sub>s</sub>.



**Fig. 5** Boxplots comparing leaf mass per area (LMA) and posterior means of photosynthetic and structural LMA components (LMA<sub>p</sub> and LMA<sub>s</sub>, respectively) across deciduous (D) and evergreen (E) leaves in the GLOPNET dataset (top), and across sites (wet and dry) and canopy strata (sun and shade) in the Panama dataset (bottom). The center line in each box indicates the median, upper and lower box edges indicate the interquartile range, whiskers show 1.5 times the interquartile range, and points are outliers. Groups sharing the same letters are not significantly different ( $P > 0.05$ ;  $t$ -tests). To isolate the effects of intraspecific variation (i.e., plastic responses to light), the Panama results shown here only include species for which both sun and shade leaves were available. Qualitatively similar results were obtained when all Panama species were included (Fig. S2). Note that the vertical axis is on a  $\log_{10}$  scale.

**Fig. 6** Measured traits related to photosynthesis and metabolism traits (nitrogen and phosphorus per-unit leaf area;  $N_{\text{area}}$  and  $P_{\text{area}}$ ) are strongly correlated with estimates (posterior means) of the photosynthetic LMA component (LMA<sub>p</sub>), and a measured structural trait (cellulose per-unit leaf area;  $CL_{\text{area}}$ ) is strongly correlated with estimates of the structural LMA component (LMA<sub>s</sub>) for the Panama dataset. Note that sun and shade leaves align along a single relationship for  $CL_{\text{area}}$  vs. LMA<sub>s</sub>, but not for  $CL_{\text{area}}$  vs. LMA or LMA<sub>p</sub>.  $N_{\text{area}}$ ,  $P_{\text{area}}$ , and  $CL_{\text{area}}$  data were not used to fit the models, and are presented here as independent support for the model results. Analogous results were obtained for  $N_{\text{area}}$  and  $P_{\text{area}}$  vs. LMA<sub>p</sub> for GLOPNET (Fig. S3). Gray symbols show 1 of 10 datasets in which LMA was randomized within sites (wet and dry) across canopy strata (sun and shade). Others details as in Fig. 1. Results for other LL models are reported in Table S3.

749

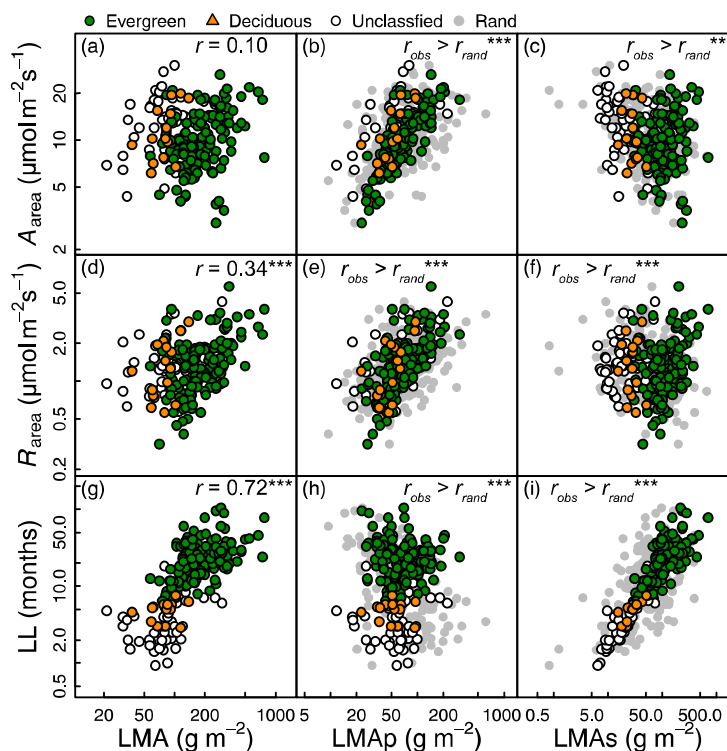

750

751 **Fig. 1** Observed and estimated leaf-trait relationships in the global GLOPNET dataset. Leaf  
752 life span (LL), net photosynthetic rate per unit leaf area ( $A_{area}$ ), and dark respiration rate per  
753 unit leaf area ( $R_{area}$ ) are plotted against observed LMA and estimates (posterior means) of  
754 photosynthetic and structural LMA components (LMAp and LMAs, respectively). Gray  
755 symbols show 1 of 10 randomized datasets, in which LMA was randomized among all leaves  
756 in the GLOPNET dataset we analyzed (which includes all leaves for which LMA,  $A_{area}$ ,  $R_{area}$ ,  
757 and LL were available). Pearson correlation coefficients are for observed LMA (left column)  
758 and posterior means of LMAp (middle column) and LMAs (right column).  $P$ -values (\*\*  $P <$   
759 0.01; \*\*\*  $P <$  0.001) for LMA test the null hypothesis of zero correlation, and for LMAp and  
760 LMAs test the null hypothesis of equal correlation in observed and randomized datasets (see  
761 ‘Randomized LMA Datasets’ in Methods for details). In some cases,  $r_{obs}$  is near zero but  
762 significantly greater than  $r_{rand}$  because  $r_{rand}$  is negative (see Table S2 for details).

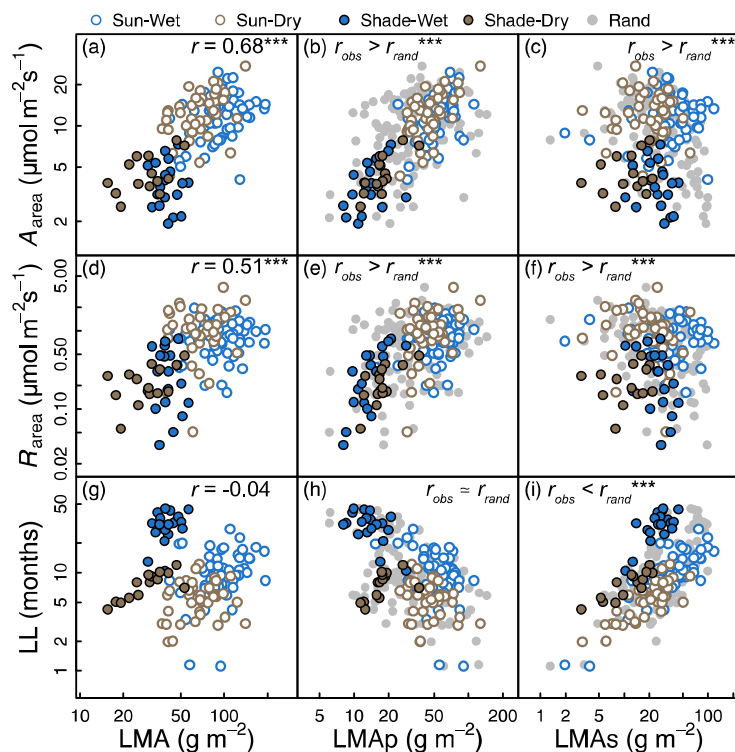

**Fig. 2** Observed and estimated leaf-trait relationships in the Panama dataset. Estimates are from the Optimal LL Model with site effects (Eq. 13 and Notes S3). Details as in Fig. 1, except that in the randomized dataset shown here (gray symbols), LMA was randomized within sites (wet and dry) across canopy strata (sun and shade). Results for other LL models are summarized in Table S3.

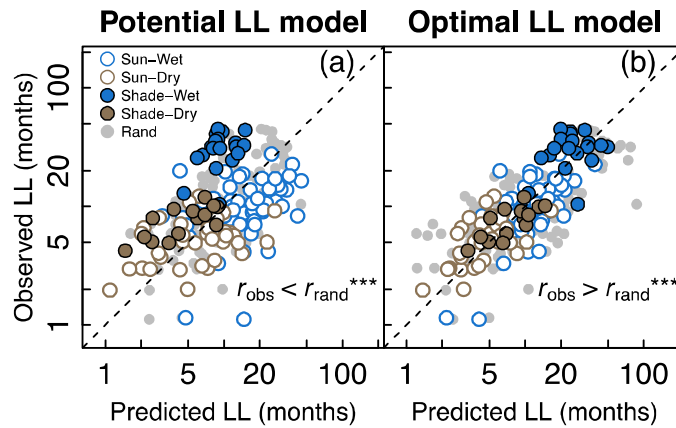

**Fig. 3** Observed vs. predicted leaf lifespan (LL) in the (a) Potential LL Model (Eq. 5) and (b) Optimal LL Model with site effects (Eq. 13 and Notes S3). Predicted LL values are posterior means. The dashed line indicates the 1:1 relationship. Gray symbols show predicted LL values from 1 of 10 randomized LMA datasets for each model. Pearson correlation coefficients are for predictions derived from the observed datasets, and  $P$ -values ( $*** P < 0.001$ ) are for the null hypothesis of equal correlation in observed and randomized datasets (see ‘Randomized LMA Datasets’ in Methods for details). Results for other LL models are reported in Table S4.

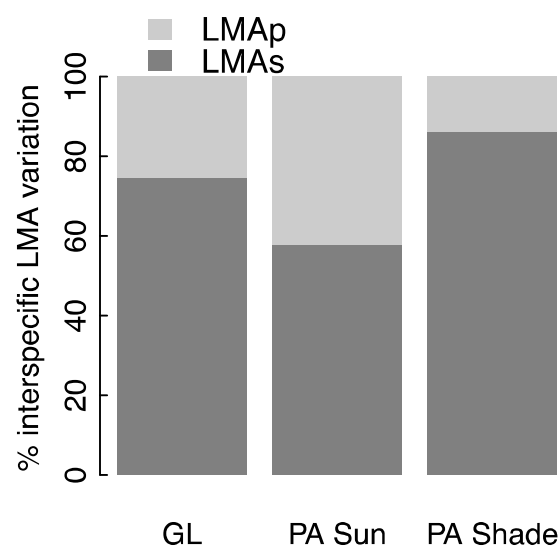

**Fig. 4** Percent of interspecific variation in leaf mass per area (LMA) explained by photosynthetic and structural components of LMA (LMAp and LMAs, respectively) for the global GLOPNET dataset (GL), sun leaves in Panama (PA Sun), and shade leaves in Panama (PA Shade). Variance was partitioned by applying Eq. 15 to posterior means of LMAp and LMAs.

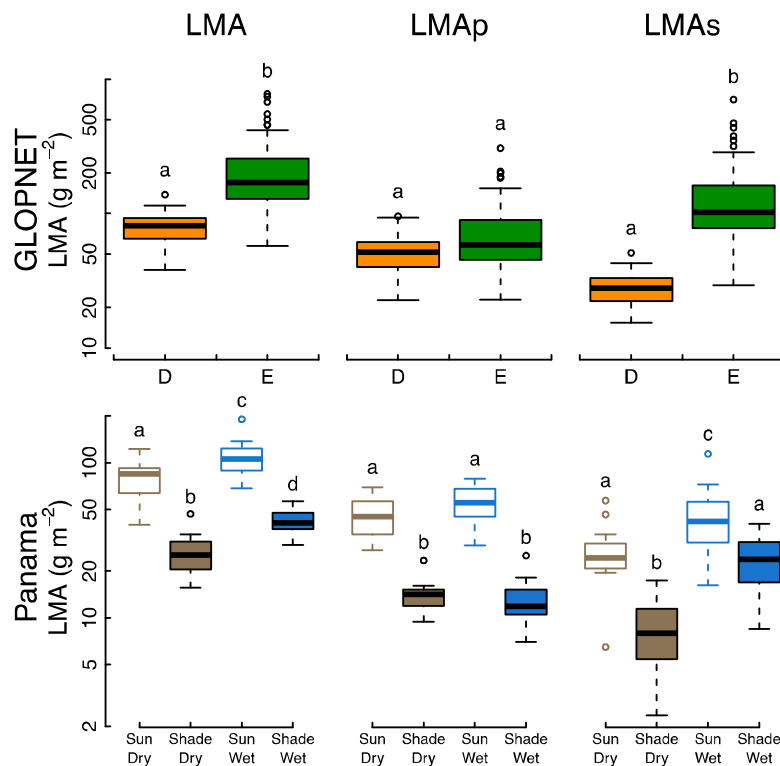

**Fig. 5** Boxplots comparing leaf mass per area (LMA) and posterior means of photosynthetic and structural LMA components (LMAp and LMAs, respectively) across deciduous (D) and evergreen (E) leaves in the GLOPNET dataset (top), and across sites (wet and dry) and canopy strata (sun and shade) in the Panama dataset (bottom). The center line in each box indicates the median, upper and lower box edges indicate the interquartile range, whiskers show 1.5 times the interquartile range, and points are outliers. Groups sharing the same letters are not significantly different ( $P > 0.05$ ;  $t$ -tests). To isolate the effects of intraspecific variation (i.e., plastic responses to light), the Panama results shown here only include species for which both sun and shade leaves were available. Qualitatively similar results were obtained when all Panama species were included (Fig. S2). Note that the vertical axis is on a  $\log_{10}$  scale.

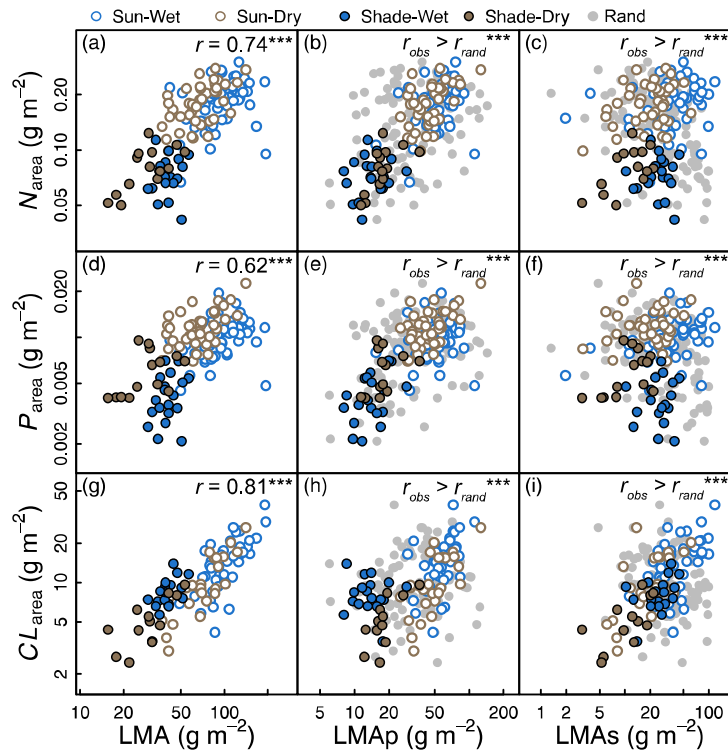

**Fig. 6** Measured traits related to photosynthesis and metabolism traits (nitrogen and phosphorus per-unit leaf area;  $N_{\text{area}}$  and  $P_{\text{area}}$ ) are strongly correlated with estimates (posterior means) of the photosynthetic LMA component (LMAp), and a measured structural trait (cellulose per-unit leaf area;  $CL_{\text{area}}$ ) is strongly correlated with estimates of the structural LMA component (LMAs) for the Panama dataset. Note that sun and shade leaves align along a single relationship for  $CL_{\text{area}}$  vs. LMAs, but not for  $CL_{\text{area}}$  vs. LMA or LMAp.  $N_{\text{area}}$ ,  $P_{\text{area}}$ , and  $CL_{\text{area}}$  data were not used to fit the models, and are presented here as independent support for the model results. Analogous results were obtained for  $N_{\text{area}}$  and  $P_{\text{area}}$  vs. LMAp for GLOPNET (Fig. S3). Gray symbols show 1 of 10 datasets in which LMA was randomized within sites (wet and dry) across canopy strata (sun and shade). Others details as in Fig. 1. Results for other LL models are reported in Table S3.
